# Supplementary material for: Study of viability of high pressure extract from pomegranate peel to improve carrot juice characteristics
Source: Royal Society of Chemistry journal article supplement (doi:10.1039/c9fo02922b), 2020-01-01
Supplement: c9fo02922b1.pdf [file c9fo02922b1.pdf]

1 **Supplementary Material: Figure legends**

2

3 **Figure S1** - Evolution of (A) pH and (B) TSS during 28 days of storage at 4 °C on untreated and treated  
4 (by HPP and TP) carrot juice without and with PPE.

5 **Figure S2** - Evolution of (A)  $L^*$ , (B)  $a^*$ , (C)  $b^*$ , and (D)  $\Delta E^*$  during 28 days of storage at 4 °C on untreated  
6 and treated (by HPP and TP) carrot juice without and with PPE.

7

8 **Supplementary Material: Table legends**

9

10 **Table S1** - Evolution of total aerobic mesophiles during 28 days of storage at 4 °C on untreated and treated  
11 carrot juice with increasing doses of PPE.

12 **Table S2** - Evolution of total aerobic psychrophiles during 28 days of storage at 4 °C on untreated and  
13 treated carrot juice with increasing doses of PPE.

14 **Table S3** - Evolution of yeasts and moulds during 28 days of storage at 4 °C on untreated and treated carrot  
15 juice with increasing doses of PPE.

16 **Table S4** - Evolution of pH during 28 days of storage at 4 °C on untreated and treated carrot juice with  
17 increasing doses of PPE.

18 **Table S5** - Evolution of total soluble solids during 28 days of storage at 4 °C on untreated and treated carrot  
19 juice with increasing doses of PPE.

20 **Table S6** - Evolution of  $L^*$  during 28 days of storage at 4 °C on untreated and treated carrot juice with  
21 increasing doses of PPE.

22 **Table S7** - Evolution of  $a^*$  during 28 days of storage at 4 °C on untreated and treated carrot juice with  
23 increasing doses of PPE.

24 **Table S8** - Evolution of  $b^*$  during 28 days of storage at 4 °C on untreated and treated carrot juice with  
25 increasing doses of PPE.

26 **Table S9** - Evolution of  $\Delta E^*$  during 28 days of storage at 4 °C on untreated and treated carrot juice with  
27 increasing doses of PPE.

28 **Table S10** - Evolution of total flavonoids during 28 days of storage at 4 °C on untreated and treated carrot  
29 juice with increasing doses of PPE.

30 **Table S11** - Evolution of hydrolysable tannins during 28 days of storage at 4 °C on untreated and treated  
31 carrot juice with increasing doses of PPE.

32 **Table S12** - Evolution of total phenolics during 28 days of storage at 4 °C on untreated and treated carrot  
33 juice with increasing doses of PPE.

34 **Table S13** - Evolution of FRAP values during 28 days of storage at 4 °C on untreated and treated carrot  
35 juice with increasing doses of PPE.

36 **Table S14** - Evolution of ABTS values during 28 days of storage at 4 °C on untreated and treated carrot  
37 juice with increasing doses of PPE.

38

39 Figure S1

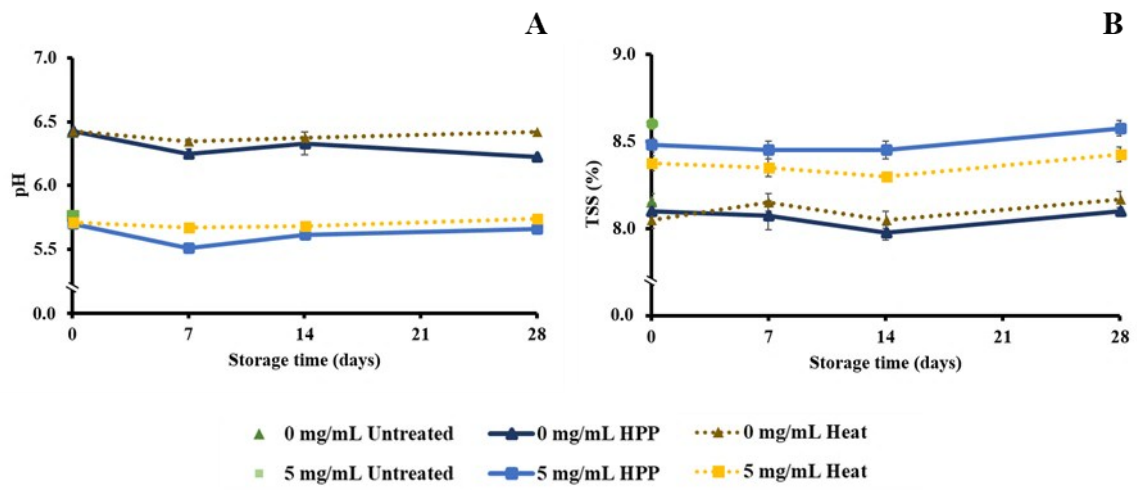

40  
41

42 **Figure S2**

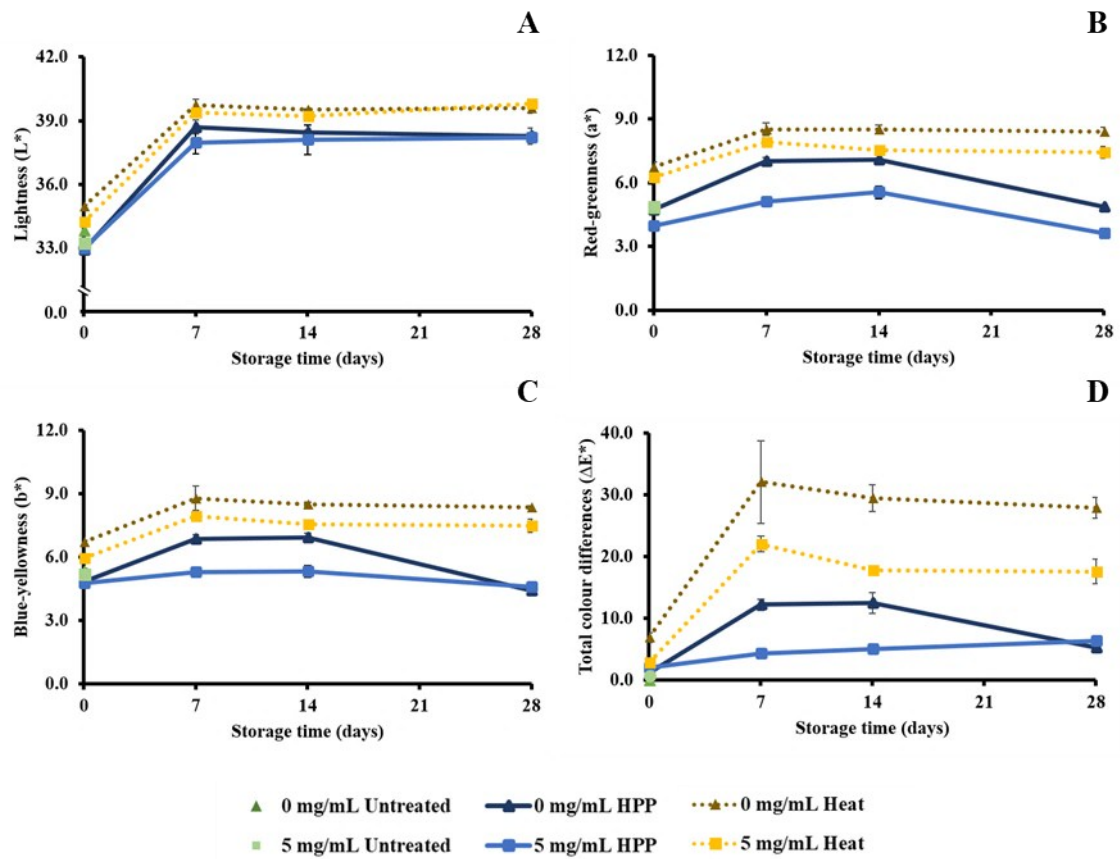

43

44

45

46 **Table S1**

47

| 48 | Treatment | [PPE]<br>(mg/mL) | Total Aerobic Mesophiles (log <sub>10</sub> CFU/mL) |       |        |                            |
|----|-----------|------------------|-----------------------------------------------------|-------|--------|----------------------------|
|    |           |                  | Day 0                                               | Day 7 | Day 14 | Day 28                     |
| 49 | Untreated | 0                | 6.40 ± 0.04 <sup>a</sup>                            | -     | -      | -                          |
| 50 |           | 5                | 6.38 ± 0.18 <sup>a</sup>                            | -     | -      | -                          |
| 51 | HPP       | 0                | ND                                                  | ND    | ND     | 4.40 ± 0.05 <sup>Aa1</sup> |
| 52 |           | 5                | ND                                                  | ND    | ND     | 3.27 ± 0.06 <sup>Ab1</sup> |
| 53 | Heat      | 0                | ND                                                  | ND    | ND     | 5.93 ± 0.33 <sup>Ba1</sup> |
| 54 |           | 5                | ND                                                  | ND    | ND     | 5.10 ± 0.10 <sup>Bb1</sup> |

55

56

57 Within the same day different upper letters mean significant differences between treatments ( $p < 0.05$ ); Within the same day different lower letters mean significant  
58 differences between PPE concentrations ( $p < 0.05$ ); Different numbers mean significant differences between days ( $p < 0.05$ ).

59

60 **Table S2**

61

| 62 | Treatment | [PPE]<br>(mg/mL) | Total Aerobic Psychrophiles (log <sub>10</sub> CFU/mL) |       |        |                            |
|----|-----------|------------------|--------------------------------------------------------|-------|--------|----------------------------|
|    |           |                  | Day 0                                                  | Day 7 | Day 14 | Day 28                     |
| 63 | Untreated | 0                | 6.45 ± 0.12 <sup>a</sup>                               | -     | -      | -                          |
| 64 |           | 5                | 6.34 ± 0.05 <sup>a</sup>                               | -     | -      | -                          |
| 65 | HPP       | 0                | ND                                                     | ND    | ND     | 4.50 ± 0.03 <sup>Aa1</sup> |
| 66 |           | 5                | ND                                                     | ND    | ND     | 3.38 ± 0.27 <sup>Ab1</sup> |
| 67 | Heat      | 0                | ND                                                     | ND    | ND     | 5.89 ± 0.35 <sup>Ba1</sup> |
| 68 |           | 5                | ND                                                     | ND    | ND     | 5.03 ± 0.16 <sup>Bb1</sup> |

69

70

71 Within the same day different upper letters mean significant differences between treatments ( $p < 0.05$ ); Within the same day different lower letters mean significant  
 72 differences between PPE concentrations ( $p < 0.05$ ); Different numbers mean significantly differences between days ( $p < 0.05$ ).

73 **Table S3**

74

| 75 | Treatment | [PPE]<br>(mg/mL) | Yeasts and Moulds (log <sub>10</sub> CFU/mL) |       |        |        |
|----|-----------|------------------|----------------------------------------------|-------|--------|--------|
|    |           |                  | Day 0                                        | Day 7 | Day 14 | Day 28 |
| 77 | Untreated | 0                | 5.02 ± 0.07 <sup>a</sup>                     | -     | -      | -      |
| 78 |           | 5                | 5.17 ± 0.12 <sup>a</sup>                     | -     | -      | -      |
| 79 | HPP       | 0                | ND                                           | ND    | ND     | ND     |
| 80 |           | 5                | ND                                           | ND    | ND     | ND     |
| 81 | Heat      | 0                | ND                                           | ND    | ND     | ND     |
| 82 |           | 5                | ND                                           | ND    | ND     | ND     |

83

84 Within the same day different upper letters mean significant differences between treatments ( $p < 0.05$ ); Within the same day different lower letters mean significant  
 85 differences between PPE concentrations ( $p < 0.05$ ); Different numbers mean significantly differences between days ( $p < 0.05$ ).

86

Table S4

| 87 | Treatment | [PPE]<br>(mg/mL) | pH                         |                            |                            |                            |
|----|-----------|------------------|----------------------------|----------------------------|----------------------------|----------------------------|
| 88 |           |                  | Day 0                      | Day 7                      | Day 14                     | Day 28                     |
| 89 | Untreated | 0                | 6.42 ± 0.00 <sup>Aa</sup>  | -                          | -                          | -                          |
| 90 |           | 5                | 5.76 ± 0.01 <sup>Ab</sup>  | -                          | -                          | -                          |
| 91 | HPP       | 0                | 6.43 ± 0.00 <sup>Aa1</sup> | 6.25 ± 0.04 <sup>Aa1</sup> | 6.33 ± 0.09 <sup>Aa1</sup> | 6.23 ± 0.01 <sup>Aa1</sup> |
| 92 |           | 5                | 5.70 ± 0.00 <sup>Ab1</sup> | 5.51 ± 0.02 <sup>Ab1</sup> | 5.61 ± 0.01 <sup>Ab1</sup> | 5.66 ± 0.01 <sup>Ab1</sup> |
| 93 | Heat      | 0                | 6.43 ± 0.00 <sup>Aa1</sup> | 6.34 ± 0.03 <sup>Aa1</sup> | 6.37 ± 0.06 <sup>Aa1</sup> | 6.42 ± 0.07 <sup>Aa1</sup> |
| 94 |           | 5                | 5.71 ± 0.01 <sup>Ab1</sup> | 5.67 ± 0.01 <sup>Ab1</sup> | 5.68 ± 0.01 <sup>Ab1</sup> | 5.74 ± 0.01 <sup>Ab1</sup> |

95

96 Within the same day different upper letters mean significant differences between treatments ( $p < 0.05$ ); Within the same day different lower letters mean significant  
 97 differences between PPE concentrations ( $p < 0.05$ ); Different numbers mean significantly differences between days ( $p < 0.05$ ); Standard deviations equal to zero mean that the  
 98 values between the replicas were the same.



99 **Table S5**

100

101

102

| Treatment | [PPE]<br>(mg/mL) | Total Soluble Solids (°Brix) |                          |                          |                          |
|-----------|------------------|------------------------------|--------------------------|--------------------------|--------------------------|
|           |                  | Day 0                        | Day 7                    | Day 14                   | Day 28                   |
| Untreated | 0                | 8.2 ± 0.0 <sup>Aa</sup>      | -                        | -                        | -                        |
|           | 5                | 8.6 ± 0.0 <sup>Ab</sup>      | -                        | -                        | -                        |
| HPP       | 0                | 8.1 ± 0.0 <sup>Aa1</sup>     | 8.1 ± 0.1 <sup>Aa1</sup> | 8.0 ± 0.0 <sup>Aa1</sup> | 8.1 ± 0.0 <sup>Aa1</sup> |
|           | 5                | 8.5 ± 0.0 <sup>Ab1</sup>     | 8.5 ± 0.0 <sup>Ab1</sup> | 8.5 ± 0.0 <sup>Ab1</sup> | 8.6 ± 0.0 <sup>Ab1</sup> |
| Heat      | 0                | 8.1 ± 0.0 <sup>Aa1</sup>     | 8.2 ± 0.0 <sup>Aa1</sup> | 8.1 ± 0.0 <sup>Aa1</sup> | 8.2 ± 0.0 <sup>Aa1</sup> |
|           | 5                | 8.4 ± 0.0 <sup>Ab1</sup>     | 8.4 ± 0.0 <sup>Ab1</sup> | 8.3 ± 0.0 <sup>Ab1</sup> | 8.4 ± 0.0 <sup>Ab1</sup> |

109

110 Within the same day different upper letters mean significant differences between treatments ( $p < 0.05$ ); Within the same day different lower letters mean significant  
 111 differences between PPE concentrations ( $p < 0.05$ ); Different numbers mean significantly differences between days ( $p < 0.05$ ). Standard deviations equal to zero mean that the  
 112 values between the replicas were the same.

113

114 **Table S6**

115

| 116 | Treatment | [PPE]<br>(mg/mL) | L* (lightness)              |                             |                             |                             |
|-----|-----------|------------------|-----------------------------|-----------------------------|-----------------------------|-----------------------------|
|     |           |                  | Day 0                       | Day 7                       | Day 14                      | Day 28                      |
| 117 | Untreated | 0                | 33.82 ± 0.18 <sup>Aa1</sup> | -                           | -                           | -                           |
| 118 |           | 5                | 33.22 ± 0.13 <sup>Aa1</sup> | -                           | -                           | -                           |
| 119 | HPP       | 0                | 32.91 ± 0.09 <sup>Ba1</sup> | 38.70 ± 0.33 <sup>Aa2</sup> | 38.46 ± 0.10 <sup>Aa2</sup> | 38.08 ± 0.38 <sup>Aa2</sup> |
| 120 |           | 5                | 32.99 ± 0.13 <sup>Ba1</sup> | 37.97 ± 0.54 <sup>Ab2</sup> | 38.09 ± 0.70 <sup>Aa2</sup> | 38.22 ± 0.06 <sup>Aa2</sup> |
| 121 | Heat      | 0                | 34.95 ± 0.09 <sup>Ca1</sup> | 39.74 ± 0.29 <sup>Ba2</sup> | 39.51 ± 0.03 <sup>Ba2</sup> | 39.58 ± 0.24 <sup>Ba2</sup> |
| 122 |           | 5                | 34.22 ± 0.05 <sup>Ca1</sup> | 39.39 ± 0.03 <sup>Bb2</sup> | 39.22 ± 0.05 <sup>Ba2</sup> | 38.80 ± 0.09 <sup>Ba2</sup> |

123

124

125 Within the same day different upper letters mean significant differences between treatments ( $p < 0.05$ ); Within the same day different lower letters mean significant  
 126 differences between PPE concentrations ( $p < 0.05$ ); Different numbers mean significantly differences between days ( $p < 0.05$ ).

127

128 **Table S7**

129

| 130 | Treatment | [PPE]<br>(mg/mL) | a* (red-greenness)         |                            |                             |                            |
|-----|-----------|------------------|----------------------------|----------------------------|-----------------------------|----------------------------|
|     |           |                  | Day 0                      | Day 7                      | Day 14                      | Day 28                     |
| 132 | Untreated | 0                | 4.81 ± 0.16 <sup>Aa</sup>  | -                          | -                           | -                          |
| 133 |           | 5                | 4.87 ± 0.00 <sup>Aa</sup>  | -                          | -                           | -                          |
| 134 | HPP       | 0                | 4.72 ± 0.07 <sup>Ba1</sup> | 7.02 ± 0.17 <sup>Aa2</sup> | 7.09 ± 0.25 <sup>Aa23</sup> | 4.87 ± 0.03 <sup>Aa4</sup> |
| 135 |           | 5                | 3.95 ± 0.08 <sup>Ba1</sup> | 5.12 ± 0.13 <sup>Aa2</sup> | 5.55 ± 0.30 <sup>Ab23</sup> | 3.61 ± 0.06 <sup>Aa4</sup> |
| 136 | Heat      | 0                | 6.75 ± 0.24 <sup>Ca1</sup> | 8.53 ± 0.29 <sup>Ba2</sup> | 8.51 ± 0.20 <sup>Ba23</sup> | 8.41 ± 0.22 <sup>Ba4</sup> |
| 137 |           | 5                | 6.26 ± 0.10 <sup>Ca1</sup> | 7.92 ± 0.17 <sup>Ba2</sup> | 7.53 ± 0.09 <sup>Bb23</sup> | 7.42 ± 0.28 <sup>Ba4</sup> |

138

139 Within the same day different upper letters mean significant differences between treatments ( $p < 0.05$ ); Within the same day different lower letters mean significant  
 140 differences between PPE concentrations ( $p < 0.05$ ); Different numbers mean significantly differences between days ( $p < 0.05$ ). Standard deviations equal to zero mean that the  
 141 values between the replicas were the same.

142

143 **Table S8**

144

| 145 | Treatment | [PPE]<br>(mg/mL) | b* (blue-yellowness)       |                            |                            |                            |
|-----|-----------|------------------|----------------------------|----------------------------|----------------------------|----------------------------|
|     |           |                  | Day 0                      | Day 7                      | Day 14                     | Day 28                     |
| 147 | Untreated | 0                | 5.33 ± 0.14 <sup>Aa1</sup> | -                          | -                          | -                          |
| 148 |           | 5                | 5.19 ± 0.18 <sup>Aa1</sup> | -                          | -                          | -                          |
| 149 | HPP       | 0                | 4.84 ± 0.07 <sup>Ba1</sup> | 6.87 ± 0.19 <sup>Aa2</sup> | 6.94 ± 0.19 <sup>Aa2</sup> | 4.43 ± 0.03 <sup>Aa3</sup> |
| 150 |           | 5                | 4.47 ± 0.12 <sup>Ba1</sup> | 5.29 ± 0.24 <sup>Aa2</sup> | 5.31 ± 0.28 <sup>Ab2</sup> | 4.61 ± 0.04 <sup>Aa3</sup> |
| 151 | Heat      | 0                | 6.72 ± 0.06 <sup>Ca1</sup> | 8.79 ± 0.57 <sup>Ba2</sup> | 8.50 ± 0.10 <sup>Ba2</sup> | 8.35 ± 0.07 <sup>Ba3</sup> |
| 152 |           | 5                | 5.95 ± 0.04 <sup>Ca1</sup> | 7.94 ± 0.06 <sup>Ba2</sup> | 7.56 ± 0.01 <sup>Bb2</sup> | 7.48 ± 0.31 <sup>Ba3</sup> |

153

154 Within the same day different upper letters mean significant differences between treatments ( $p < 0.05$ ); Within the same day different lower letters mean significant  
 155 differences between PPE concentrations ( $p < 0.05$ ); Different numbers mean significantly differences between days ( $p < 0.05$ ).

156

157 **Table S9**

158

| 159 | Treatment | [PPE]<br>(mg/mL) | $\Delta E^*$ (total colour changes) |                        |                        |                        |
|-----|-----------|------------------|-------------------------------------|------------------------|------------------------|------------------------|
|     |           |                  | Day 0                               | Day 7                  | Day 14                 | Day 28                 |
| 161 | Untreated | 0                | $0.00 \pm 0.13^{Aa}$                | -                      | -                      | -                      |
| 162 |           | 5                | $0.65 \pm 0.15^{Aa}$                | -                      | -                      | -                      |
| 163 | HPP       | 0                | $1.17 \pm 0.08^{Aa1}$               | $1.17 \pm 0.08^{Aa2}$  | $12.18 \pm 0.95^{Aa2}$ | $5.27 \pm 0.40^{Aa2}$  |
| 164 |           | 5                | $1.95 \pm 0.41^{Aa1}$               | $1.95 \pm 0.41^{Aa2}$  | $4.33 \pm 0.55^{Aa2}$  | $6.40 \pm 0.19^{Aa2}$  |
| 165 | Heat      | 0                | $6.89 \pm 0.83^{Ba1}$               | $32.07 \pm 6.66^{Ba2}$ | $29.46 \pm 2.14^{Ba2}$ | $27.90 \pm 1.65^{Ba2}$ |
| 166 |           | 5                | $2.90 \pm 0.31^{Ba1}$               | $22.05 \pm 1.31^{Ba2}$ | $17.75 \pm 0.44^{Ba2}$ | $16.34 \pm 3.62^{Ba2}$ |

167

168 Within the same day different upper letters mean significant differences between treatments ( $p < 0.05$ ); Within the same day different lower letters mean significant  
 169 differences between PPE concentrations ( $p < 0.05$ ); Different numbers mean significantly differences between days ( $p < 0.05$ ).

170

171 **Table S10**

172

| 173 | Treatment | [PPE]   | Flavonoids (mg/mL)           |                              |                              |                              |                              |
|-----|-----------|---------|------------------------------|------------------------------|------------------------------|------------------------------|------------------------------|
| 174 |           | (mg/mL) | Day 0                        | Day 7                        | Day 14                       | Day 28                       | Day 42                       |
| 175 | Untreated | 0       | 0.014 ± 0.004 <sup>Aa1</sup> | -                            | -                            | -                            |                              |
| 176 |           | 5       | 0.112 ± 0.012 <sup>Ab1</sup> | -                            | -                            | -                            |                              |
| 177 | HPP       | 0       | 0.022 ± 0.005 <sup>Aa1</sup> | 0.011 ± 0.004 <sup>Aa1</sup> | 0.012 ± 0.003 <sup>Aa1</sup> | 0.015 ± 0.002 <sup>Aa1</sup> | 0.008 ± 0.001 <sup>Aa1</sup> |
| 178 |           | 5       | 0.088 ± 0.004 <sup>Ab1</sup> | 0.090 ± 0.005 <sup>Ab1</sup> | 0.088 ± 0.004 <sup>Ab1</sup> | 0.086 ± 0.004 <sup>Ab1</sup> | 0.090 ± 0.002 <sup>Ab1</sup> |
| 179 | Heat      | 0       | 0.035 ± 0.001 <sup>Aa1</sup> | 0.024 ± 0.001 <sup>Aa1</sup> | 0.025 ± 0.002 <sup>Aa1</sup> | 0.019 ± 0.000 <sup>Aa1</sup> | 0.025 ± 0.006 <sup>Aa1</sup> |
| 180 |           | 5       | 0.114 ± 0.011 <sup>Ab1</sup> | 0.147 ± 0.011 <sup>Ab1</sup> | 0.138 ± 0.003 <sup>Ab1</sup> | 0.147 ± 0.008 <sup>Ab1</sup> | 0.150 ± 0.004 <sup>Ab1</sup> |

181

182 Within the same day different upper letters mean significant differences between treatments ( $p < 0.05$ ); Within the same day different lower letters mean significant  
 183 differences between PPE concentrations ( $p < 0.05$ ); Different numbers mean significantly differences between days ( $p < 0.05$ ).

184

185 **Table S11**

| 186<br>187<br>188 | Treatment | [PPE]<br>(mg/mL) | Hydrolysable Tannins (mg/mL) |                             |                              |                             |
|-------------------|-----------|------------------|------------------------------|-----------------------------|------------------------------|-----------------------------|
|                   |           |                  | Day 0                        | Day 7                       | Day 14                       | Day 28                      |
| 189               | Untreated | 5                | 1.058 ± 0.108 <sup>A</sup>   | -                           | -                            | -                           |
| 190               | HPP       | 5                | 0.613 ± 0.062 <sup>B12</sup> | 0.539 ± 0.037 <sup>A1</sup> | 0.477 ± 0.062 <sup>A12</sup> | 0.429 ± 0.021 <sup>A2</sup> |
| 191               | Heat      | 5                | 0.952 ± 0.044 <sup>A12</sup> | 0.902 ± 0.032 <sup>B1</sup> | 0.883 ± 0.010 <sup>B12</sup> | 0.819 ± 0.023 <sup>B2</sup> |

192

193 Within the same day different upper letters mean significant differences between treatments ( $p < 0.05$ ); Within the same day different lower letters mean significant  
194 differences between PPE concentrations ( $p < 0.05$ ); Different numbers mean significant differences between days ( $p < 0.05$ ).

195

196 **Table S12**

| 197 | 198 | 199 | Treatment | [PPE]<br>(mg/mL) | Total phenolic content (mg/mL) |                               |                               |                              |
|-----|-----|-----|-----------|------------------|--------------------------------|-------------------------------|-------------------------------|------------------------------|
|     |     |     |           |                  | Day 0                          | Day 7                         | Day 14                        | Day 28                       |
| 200 |     |     | Untreated | 0                | 0.148 ± 0.027 <sup>Aa</sup>    | -                             | -                             | -                            |
| 201 |     |     |           | 5                | 0.520 ± 0.040 <sup>Ab</sup>    | -                             | -                             | -                            |
| 202 |     |     | HPP       | 0                | 0.118 ± 0.009 <sup>Aa1</sup>   | 0.108 ± 0.028 <sup>Aa12</sup> | 0.128 ± 0.006 <sup>Aa12</sup> | 0.134 ± 0.006 <sup>Aa2</sup> |
| 203 |     |     |           | 5                | 0.462 ± 0.002 <sup>Ab1</sup>   | 0.465 ± 0.029 <sup>Ab12</sup> | 0.471 ± 0.085 <sup>Ab12</sup> | 0.400 ± 0.013 <sup>Ab2</sup> |
| 204 |     |     | Heat      | 0                | 0.132 ± 0.011 <sup>Aa1</sup>   | 0.162 ± 0.022 <sup>Aa12</sup> | 0.183 ± 0.014 <sup>Aa12</sup> | 0.152 ± 0.013 <sup>Aa2</sup> |
| 205 |     |     |           | 5                | 0.434 ± 0.038 <sup>Ab1</sup>   | 0.451 ± 0.009 <sup>Ab12</sup> | 0.508 ± 0.004 <sup>Ab12</sup> | 0.544 ± 0.045 <sup>Ab2</sup> |

206

207 Within the same day different upper letters mean significant differences between treatments ( $p < 0.05$ ); Within the same day different lower letters mean significant  
 208 differences between PPE concentrations ( $p < 0.05$ ); Different numbers mean significantly differences between days ( $p < 0.05$ ).

209



210 **Table S13**

211

| 212 | Treatment | [PPE]<br>(mg/mL) | FRAP (mg/mL)                 |                              |                               |                              |
|-----|-----------|------------------|------------------------------|------------------------------|-------------------------------|------------------------------|
|     |           |                  | Day 0                        | Day 7                        | Day 14                        | Day 28                       |
| 214 | Untreated | 0                | 0.318 ± 0.022 <sup>Aa1</sup> | -                            | -                             | -                            |
| 215 |           | 5                | 2.367 ± 0.291 <sup>Ab1</sup> | -                            | -                             | -                            |
| 216 | HPP       | 0                | 0.214 ± 0.001 <sup>Aa1</sup> | 0.183 ± 0.007 <sup>Aa2</sup> | 0.150 ± 0.018 <sup>Aa12</sup> | 0.218 ± 0.049 <sup>Aa2</sup> |
| 217 |           | 5                | 1.490 ± 0.036 <sup>Ab1</sup> | 1.972 ± 0.029 <sup>Ab2</sup> | 1.719 ± 0.527 <sup>Ab12</sup> | 1.565 ± 0.309 <sup>Ab2</sup> |
| 218 | Heat      | 0                | 0.237 ± 0.011 <sup>Aa1</sup> | 0.415 ± 0.031 <sup>Aa2</sup> | 0.438 ± 0.101 <sup>Aa12</sup> | 0.362 ± 0.026 <sup>Aa2</sup> |
| 219 |           | 5                | 2.791 ± 0.006 <sup>Ab1</sup> | 3.518 ± 0.305 <sup>Ab2</sup> | 3.269 ± 0.047 <sup>Ab12</sup> | 3.896 ± 0.069 <sup>Ab2</sup> |

220

221 Within the same day different upper letters mean significant differences between treatments ( $p < 0.05$ ); Within the same day different lower letters mean significant  
 222 differences between PPE concentrations ( $p < 0.05$ ); Different numbers mean significantly differences between days ( $p < 0.05$ ).

223

224 **Table S14**

225

| 226 | Treatment | [PPE]<br>(mg/mL) | ABTS (mg/mL)                 |                              |                              |                              |                              |
|-----|-----------|------------------|------------------------------|------------------------------|------------------------------|------------------------------|------------------------------|
|     |           |                  | 227 Day 0                    | Day 7                        | Day 14                       | Day 28                       | Day 42                       |
| 228 | Untreated | 0                | 0.153 ± 0.004 <sup>Aa1</sup> | -                            | -                            | -                            | -                            |
| 229 |           | 5                | 1.159 ± 0.154 <sup>Ab1</sup> | -                            | -                            | -                            | -                            |
| 230 | HPP       | 0                | 0.105 ± 0.008 <sup>Aa1</sup> | 0.106 ± 0.019 <sup>Aa1</sup> | 0.100 ± 0.018 <sup>Aa1</sup> | 0.132 ± 0.012 <sup>Aa1</sup> | 0.119 ± 0.004 <sup>Aa1</sup> |
| 231 |           | 5                | 0.912 ± 0.048 <sup>Ab1</sup> | 0.849 ± 0.095 <sup>Ab1</sup> | 0.801 ± 0.044 <sup>Ab1</sup> | 0.752 ± 0.063 <sup>Ab1</sup> | 0.760 ± 0.059 <sup>Ab1</sup> |
| 232 | Heat      | 0                | 0.155 ± 0.007 <sup>Aa1</sup> | 0.156 ± 0.007 <sup>Aa1</sup> | 0.152 ± 0.006 <sup>Aa1</sup> | 0.135 ± 0.004 <sup>Aa1</sup> | 0.119 ± 0.001 <sup>Aa1</sup> |
| 233 |           | 5                | 1.208 ± 0.115 <sup>Ab1</sup> | 1.157 ± 0.115 <sup>Ab1</sup> | 1.082 ± 0.060 <sup>Ab1</sup> | 1.118 ± 0.076 <sup>Ab1</sup> | 1.013 ± 0.139 <sup>Ab1</sup> |

234

235 Within the same day different upper letters mean significant differences between treatments ( $p < 0.05$ ); Within the same day different lower letters mean significant  
 236 differences between PPE concentrations ( $p < 0.05$ ); Different numbers mean significantly differences between days ( $p < 0.05$ ).
